# Supplementary material for: The reaction of an iridium PNP complex with parahydrogen facilitates polarisation transfer without chemical change
Source: Royal Society of Chemistry journal article supplement (doi:10.1039/c4dt03088e), 2014-11-19
Supplement: c4dt03088e1.pdf [file c4dt03088e1.pdf]

## **Supplementary information.**

### **The reaction of an Iridium PNP complex with *parahydrogen* facilitates polarization transfer without chemical change.**

Arthur J. Holmes, Peter J. Rayner, Michael J. Cowley, , Gary G. R. Green, Adrian C. Whitwood  
and Simon B. Duckett\*

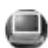

## Contents

|     |                                                                                        |    |
|-----|----------------------------------------------------------------------------------------|----|
| 1.  | General conditions:.....                                                               | 3  |
| 2.  | Synthetic procedures.....                                                              | 3  |
| 3.  | Sample preparation:.....                                                               | 7  |
| 4.  | Kinetic measurements of the exchange of H <sub>2</sub> and pyridine in <b>4</b> .....  | 7  |
| 5.  | Effect of hydrogen pressure.....                                                       | 8  |
| 6.  | Effect of pyridine concentration on the pyridine on hydride ligand exchange rates..... | 10 |
| 7.  | Quantification of polarisation:.....                                                   | 12 |
| 8.  | Effect of transfer field and temperature.....                                          | 12 |
| 9.  | Characterisation data for <b>4</b> .....                                               | 13 |
| 10. | X-Ray crystal structure for <b>4</b> .....                                             | 13 |

## 1. General conditions

All experimental procedures were performed under an atmosphere of nitrogen gas using standard Schlenk line techniques or in an M-Braun glove box. All solvents were dried using an M-Braun solvent system or distilled from the appropriated drying agent under N<sub>2</sub>. Deuterated d<sub>4</sub>-methanol, and h<sub>5</sub>-pyridine were obtained from Sigma–Aldrich, d<sub>5</sub>-pyridine was obtained from Cambridge isotopes and used as supplied.

## 2. Synthetic procedures

[(C<sub>5</sub>H<sub>3</sub>N(CH<sub>2</sub>P(*t*Bu)<sub>2</sub>)<sub>2</sub>)IrH(C<sub>8</sub>H<sub>11</sub>)(NCCH<sub>3</sub>)]BF<sub>4</sub> (**1**) was prepared as accoring to publised methods<sup>1</sup>.

### 2,6-Dimethyl-3,4,5-trichloropyridine dicarboxylate<sup>2</sup>

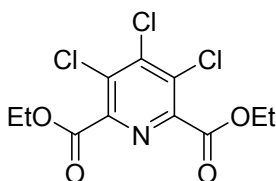

Pentachloropyridine (4.58 g, 18.0mmol, 1.0 eq.), Pd(OAc)<sub>2</sub> (262mg, 1.17mmol, 6.5 mol%), 1,4-bis(diphenylphosphino)butane (515mg, 1.21mol, 6.7 mol%), and Na<sub>2</sub>CO<sub>3</sub> (2.00 g, 18.9mmol, 1.05 eq.) in EtOH (50 mL) were sealed in a 300 mL pressure reactor and purged with N<sub>2</sub>. Then, the reactor was pressurised to 5bar with CO and the reactor was heated at 100 °C for 20 h. During this time a small pressure drop was observed. The reactor was cooled, vented and the contents filtered through Celite®. The filtrate was concentrated under reduced pressure to give the crude product. Purification by flash column chromatography on silica with 95:5-80:20 hexane-EtOAc as eluent gave 2,6-Dimethyl-3,4,5-trichloropyridine dicarboxylate (3.24g, 55%) as a colourless oil, R<sub>f</sub> (9:1 hexane-EtOAc) 0.2; <sup>1</sup>H NMR (500 MHz, CDCl<sub>3</sub>) δ 4.45 (q, *J* = 7.0 Hz, 2H, CH<sub>2</sub>), 1.40 (t, *J* = 7.0 Hz, 3H, Me); <sup>13</sup>C NMR (100.6 MHz, CDCl<sub>3</sub>) δ 163.1 (C=O), 147.4, 144.2, 131.2, 62.9 (CH<sub>2</sub>), 14.0 (Me); MS (ESI) *m/z* 326 [(M + H)<sup>+</sup>, 100], 328 [(M + H)<sup>+</sup>, 100], 330 [(M + H)<sup>+</sup>, 25]; HRMS *m/z* calcd for C<sub>11</sub>H<sub>10</sub><sup>35</sup>Cl<sub>3</sub>NO<sub>4</sub> (M + H)<sup>+</sup> 325.9754, found 325.9759 (+0.5 ppm error). Spectroscopic data consistent with those reported in the literature.<sup>2</sup>

### d<sub>3</sub>-2,6-Diethyl pyridine dicarboxylate

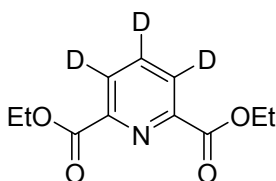

5% Pd/C (75 mg, 10 wt%) in D<sub>2</sub>O (8 mL) was stirred under a D<sub>2</sub>(g) atmosphere for 1 h. Then, a solution of 2,6-Dimethyl-3,4,5-trichloropyridine dicarboxylate (750 mg, 2.31 mmol, 1.0 eq.) and Et<sub>3</sub>N (1.0 mL) in THF (3 mL) was added dropwise. The resulting suspension was stirred at rt for 5 h. Then, the suspension was filtered through Celite® and the filtrate was extracted with EtOAc (3 x 15 mL). The combined organic layers were dried (Na<sub>2</sub>SO<sub>4</sub>) and concentrated under reduced pressure to give the crude product. Purification by flash column chromatography on silica using 8:2 - 4:6 hexane-EtOAc as eluent gave d<sub>3</sub>-diethyl pyridine dicarboxylate (428 mg, 82%, 98%D incorporation) as a colourless needles, mp 41-43 °C (lit.,<sup>3</sup> 45-46 °C); R<sub>f</sub> (1:1 hexane-EtOAc) 0.2; <sup>1</sup>H NMR (500 MHz, CDCl<sub>3</sub>) δ 8.23 (s, 0.03H), 7.97 (s, 0.02H), 4.45-4.40 (m, 2H), 1.41-1.37 (m, 3H); <sup>13</sup>C NMR

(125.8 MHz, CDCl<sub>3</sub>)  $\delta$  164.6 (C=O), 148.5, 137.7 (t,  $J = 25$  Hz), 127.6 (t,  $J = 25$  Hz), 62.2 (CH<sub>2</sub>), 14.2 (Me); MS (ESI)  $m/z$  227 [(M + H)<sup>+</sup>, 100]; HRMS  $m/z$  calcd for C<sub>11</sub>H<sub>10</sub>D<sub>3</sub>NO<sub>4</sub> (M + H)<sup>+</sup> 227.1111, found 227.1113 (+0.2 ppm error). Spectroscopic data consistent with those reported in the literature.<sup>3</sup>

#### **d<sub>7</sub>-2,6 pyridine dimethanol**

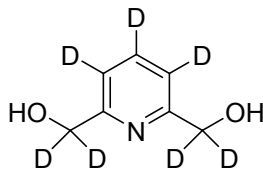

NaBD<sub>4</sub> (238 mg, 5.68mmol, 4.0 eq.) was added portion wise to a stirred solution of d<sub>3</sub>-diethyl pyridine dicarboxylate (320 mg, 1.42 mmol, 1.0 eq.) in MeOD (7 mL) under N<sub>2</sub>. The resulting solution was stirred at 65 °C for 2 h. Then, the solution was cooled to rt and concentrated under reduced pressure to give the crude product. Purification by flash column chromatography on silica using 95:5 - 7:3 CH<sub>2</sub>Cl<sub>2</sub>-MeOH as eluent gave d<sub>7</sub>-pyridine dimethanol (178 mg, 86% yield, 98%D incorporation) as a white solid, mp 110-112 °C (lit.,<sup>4</sup> 114-115 °C); R<sub>f</sub> (8:2 CH<sub>2</sub>Cl<sub>2</sub>-MeOH) 0.15; <sup>13</sup>C NMR (100.6 MHz, CDCl<sub>3</sub>)  $\delta$  158.2, 137.6 (t,  $J = 22$  Hz, *para*-CD), 119.3 (t,  $J = 23$  Hz, *meta*-CD), 63.4 (pent.,  $J = 22.0$  Hz, CD<sub>2</sub>); MS (ESI)  $m/z$  169 [(M + Na)<sup>+</sup>, 100], 147 [(M + H)<sup>+</sup>, 50]; HRMS  $m/z$  calcd for C<sub>7</sub>H<sub>2</sub>D<sub>7</sub>NO<sub>2</sub> (M + H)<sup>+</sup> 147.1142, found 147.1145 (+2.8 ppm error). Spectroscopic data consistent with those reported in the literature for h<sub>7</sub>-2,6 pyridine dimethanol.<sup>5</sup>

#### **d<sub>7</sub>-2,6-Bis(chloromethyl)pyridine**

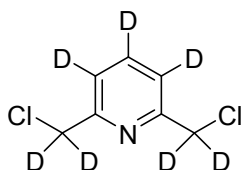

SOCl<sub>2</sub> (150  $\mu$ L, 2.06mmol, 3.0 eq.) was added dropwise to a stirred solution of d<sub>7</sub>-pyridine dimethanol (100 mg, 0.69mmol, 1.0 eq.) in THF (10 mL) at rt under N<sub>2</sub>. The resulting solution was stirred at 65 °C for 1h and then cooled to rt. The solution was poured into sat. NaHCO<sub>3(aq)</sub> solution (15 mL) and the two layers were separated. Then, the aqueous layer was extracted with EtOAc (3 x 15 mL) and the combined organic layers were dried (Na<sub>2</sub>SO<sub>4</sub>) and concentrated under reduced pressure to give the crude product. Purification by flash column chromatography on silica using 95:5 - 8:2 hexane-EtOAc as eluent gave d<sub>7</sub>-2,6 bis(chloromethyl)pyridine (118 mg, 93%) as colourless needles, mp 73-75 °C (lit.,<sup>6</sup> 74 °C); R<sub>f</sub> (9:1 hexane-EtOAc) 0.2; <sup>13</sup>C NMR (100.6 MHz, CDCl<sub>3</sub>)  $\delta$  156.2, 137.7 (t,  $J = 25.0$  Hz, *para*-CD), 121.8 (t,  $J = 25.0$  Hz, *meta*-CD), 45.9 (pent.,  $J = 23.0$  Hz, CD<sub>2</sub>); MS (ESI)  $m/z$  183 [(M + H)<sup>+</sup>, 100], 185 [(M + H)<sup>+</sup>, 65], 187 [(M + H)<sup>+</sup>, 10]; HRMS  $m/z$  calcd for C<sub>7</sub>D<sub>7</sub>N<sup>35</sup>Cl<sub>2</sub> (M + H)<sup>+</sup> 183.0473, found 183.0468 (-0.5 ppm error). Spectroscopic data consistent with those reported in the literature for h<sub>7</sub>-2,6-bis(chloromethyl)pyridine.<sup>7</sup>

#### **d<sub>7</sub>-2,6-Bis(di-tert-butylphosphinomethyl)pyridine di-borane complex<sup>8</sup>**

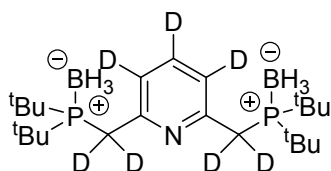

$d_7$ -2,6 bis(chloromethyl)pyridine (70 mg, 0.38 mmol, 1.0 eq.) was added to a stirred biphasic solution of di(*tert*-butyl)phosphine borane complex (182 mg, 1.14 mmol, 3.0 eq.), tetrabutylammonium bromide (12 mg, 0.038 mmol, 10 mol%), NaOD (8 ml of a 40 wt% solution in  $D_2O$ ) and toluene (4 mL). The resulting biphasic solution was stirred at rt for 1 h. Then, EtOAc (15 mL) and water (10 mL) were added and the two layers separated. The aqueous layer was extracted with EtOAc (3 x 15 mL) and the combined organic layers were dried ( $MgSO_4$ ) and concentrated under reduced pressure to give the crude product. Purification by flash column chromatography gave on silica using 9:1 – 8:2 hexane-EtOAc  $d_7$ -2,6-bis(di-*tert*-butylphosphinomethyl)pyridine di-borane complex (161 mg, 99%) as a white crystalline solid, mp 154–156 °C;  $R_f$  (8:2 hexane-EtOAc) 0.2;  $^1H$  NMR (400 MHz,  $CDCl_3$ )  $\delta$  7.54 (s, 0.03H, *p*-CH), 7.45 (s, 0.07H, *m*-CH), 3.27 (d,  $J = 12.0$  Hz, 0.06H,  $CH_2$ ), 1.27 (d,  $J = 12.5$  Hz, 36H,  $CH_3$ ), 0.92–0.04 (br m, 6H,  $BH_3$ );  $^{31}P$  NMR (162 MHz,  $CDCl_3$ )  $\delta$  46.5;  $^{13}C$  NMR (100.6 MHz,  $CDCl_3$ )  $\delta$  154.3 (Ar), 135.3 (t,  $J = 25.0$  Hz, *para*-CD), 123.3 (t,  $J = 25.0$  Hz, *meta*-CD), 32.7 (d,  $J = 25.0$  Hz,  $CM_{e3}$ ), 28.1 ( $CM_{e3}$ ); MS (ESI)  $m/z$  431 [(M + H) $^+$ , 100]; HRMS  $m/z$  calcd for  $C_{23}H_{42}D_7NP_2B_2$  (M + H) $^+$  431.4035, found 431.4046 (+0.9 ppm error).

Note:  $CD_2$  not evident in  $^{13}C$  NMR spectrum. For  $h_7$ -2,6-bis(di-*tert*-butylphosphinomethyl)pyridine di-borane complex (see below)  $CH_2$  appears at  $\delta_C$  28.7 (d,  $J = 24.0$  Hz,  $CH_2$ ).

#### [( $C_5D_3N(CD_2P(t-Bu)_2)_2$ ) $IrH(C_8H_{11})(NCCH_3)$ ] $BF_4$ **d7-1**

$HBF_4 \cdot OEt_2$  (1.0 mL) was added to a stirred solution of  $d_7$ -2,6-bis(di-*tert*-butylphosphinomethyl)pyridine di-borane complex (30 mg, 0.07 mmol, 1.0 eq.) in MeOD (10 mL) at rt under  $N_2$ . The resulting solution was stirred at 80 °C for 16 h. Then, the solution was cooled to rt and evaporated under reduced pressure. MeOD (5 mL) and diisopropylaminomethyl-polystyrene (233 mg of 200–400 mesh particle size, extent of labelling: 3 mmol/g, 0.70 mmol, 10.0 eq.) were sequentially added to the residue. The resulting suspension was stirred for 1 h *atrt*. Then, the suspension was filtered by cannula and washed with MeCN (2 x 5 mL). The filtrate was evaporated under reduced pressure. The crude phosphine was dissolved in MeCN (5 mL) and added to  $[Ir(COD)_2]BF_4$  (35 mg, 0.07 mmol, 1.0 eq.). The resulting solution was stirred at rt in a glove box for 18 h. Then, the solvent was evaporated under reduced pressure and the residue was washed with MeCN (1 x 5 mL) and hexane (3 x 5 mL) to give **d7-1** (30 mg, 58 %) as an orange powder. **d7-1**  $^1H$  NMR (400 MHz,  $CD_3OD$ )  $\delta$  -22.3 (t, d,  $J_{HH} = 14.4$  Hz, 13.3 Hz, 1H, Ir-*H*), -18.92 (t, d,  $J_{HH} = 14.4$  Hz, 13.3 Hz, 1H, Ir-*H*), 1.04 (m, 18H, PC- $(CH_3)_3$ ), 1.24 (m, 18H, PC- $(CH_3)_3$ ), 7.64 (d,  $J_{HH} = 7.8$  Hz, 2H,  $H_{3,5}$ ), 7.91 (t,  $J_{HH} = 7.8$  Hz, 1H);  $^{31}P$  NMR ( $CD_3OD$ )  $\delta$  49.93(s).

#### **d4-2,6-Bis(di-*tert*-butylphosphinomethyl)pyridine di-borane complex<sup>8</sup>**

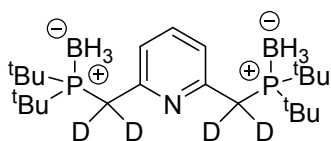

2,6-bis(chloromethyl)pyridine (105 mg, 0.60 mmol, 1.0 eq.) was added to a stirred biphasic solution of di(*tert*-butyl)phosphine borane complex (288 mg, 1.80 mmol, 3.0 eq.), tetrabutylammonium bromide (19 mg, 0.06 mmol, 10 mol%), NaOD (12 ml of a 40 wt% solution in D<sub>2</sub>O) and toluene (6 mL). The resulting biphasic solution was stirred at rt for 16 h. Then, EtOAc (15 mL) and water (10 mL) were added and the two layers separated. The aqueous layer was extracted with EtOAc (3 x 15 mL) and the combined organic layers were dried (MgSO<sub>4</sub>) and concentrated under reduced pressure to give the crude product. Purification by flash column chromatography gave on silica using 9:1 – 8:2 hexane-EtOAc d<sub>4</sub>-2,6-bis(di-*tert*-butylphosphinomethyl)pyridine di-borane complex (251 mg, 98%, 95% D) as a white crystalline solid, mp 153-155 °C; R<sub>f</sub> (8:2 hexane-EtOAc) 0.2; <sup>1</sup>H NMR (400 MHz, CDCl<sub>3</sub>) δ 7.54 (t, *J* = 8.0 Hz, 1H, *p*-CH), 7.45 (d, *J* = 8.0 Hz, 2H, *m*-CH), 3.27 (d, *J* = 12.0 Hz, 0.22H, CH<sub>2</sub>), 1.27 (d, *J* = 12.5 Hz, 36H, CH<sub>3</sub>), 0.92-0.04 (br m, 6H, BH<sub>3</sub>); <sup>31</sup>P NMR (162 MHz, CDCl<sub>3</sub>) δ 46.5; <sup>13</sup>C NMR (100.6 MHz, CDCl<sub>3</sub>) δ 154.4, 136.0 (Ar), 123.7 (Ar), 32.6 (d, *J* = 25.5 Hz, CMe<sub>3</sub>), 28.2 (CMe<sub>3</sub>); MS (ESI) *m/z* 428 [(M + H)<sup>+</sup>, 100]; HRMS *m/z* calcd for C<sub>23</sub>H<sub>45</sub>D<sub>4</sub>NP<sub>2</sub>B<sub>2</sub> (M + H)<sup>+</sup> 428.3856, found 428.3849 (−0.5 ppm error).

Note: CD<sub>2</sub> not evident in <sup>13</sup>C NMR spectrum. For h<sub>7</sub>-2,6-bis(di-*tert*-butylphosphinomethyl)pyridine di-borane complex (see below) CH<sub>2</sub> appears at δ<sub>C</sub> 28.7 (d, *J* = 24.0 Hz, CH<sub>2</sub>).

#### [(C<sub>5</sub>H<sub>3</sub>N(CD<sub>2</sub>P(*t*-Bu)<sub>2</sub>)<sub>2</sub>)<sub>2</sub>IrH(C<sub>8</sub>H<sub>11</sub>)(NC<sub>2</sub>H<sub>3</sub>)]BF<sub>4</sub> d<sub>4</sub>-1

HBf<sub>4</sub>·OEt<sub>2</sub> (1.0 mL) was added to a stirred solution of d<sub>7</sub>-2,6-bis(di-*tert*-butylphosphinomethyl)pyridine di-borane complex d<sub>4</sub>-8 (30 mg, 0.07 mmol, 1.0 eq.) in MeOD (10 mL) at rt under N<sub>2</sub>. The resulting solution was stirred at 80 °C for 16 h. Then, the solution was cooled to rt and evaporated under reduced pressure. MeOD (5 mL) and diisopropylaminomethyl-polystyrene (233 mg of 200-400 mesh particle size, extent of labeling: 3 mmol/g, 0.70 mmol, 10.0 eq.) were sequentially added to the residue. The resulting suspension was stirred for 1 h *atrt*. Then, the suspension was filtered by cannula and washed with MeCN (2 x 5 mL). The filtrate was evaporated under reduced pressure. The crude phosphine was dissolved in MeCN (5 mL) and added to [Ir(COD)<sub>2</sub>]<sub>2</sub>BF<sub>4</sub> (35 mg, 0.07 mmol, 1.0 eq.). The resulting solution was stirred at rt in a glove box for 18 h. Then, the solvent was evaporated under reduced pressure and the residue was washed with MeCN (1 x 5 mL) and hexane (3 x 5 mL) to give d<sub>4</sub>-1 (24 mg, 47 %) as an orange powder. d<sub>4</sub>-1 <sup>1</sup>H NMR (400 MHz, CD<sub>3</sub>OD) δ -22.3 (t, d, J<sub>HH</sub> = 14.4 Hz, 13.3 Hz, 1H, Ir-*H*), -18.92 (t, d, J<sub>HH</sub> = 14.4 Hz, 13.3 Hz 1H, Ir-*H*), 1.04 (m, 18H, PC-(CH<sub>3</sub>)<sub>3</sub>), 1.24 (m, 18H, PC-(CH<sub>3</sub>)<sub>3</sub>); <sup>31</sup>P NMR (CD<sub>3</sub>OD) δ 49.93(s).

#### h<sub>7</sub>-2,6-Bis(di-*tert*-butylphosphinomethyl)pyridine di-borane complex<sup>8</sup>

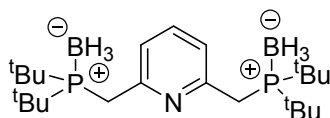

2,6-Bis(chloromethyl)pyridine 7 (53 mg, 0.30 mmol, 1.0 eq.) was added to a stirred biphasic solution of di(*tert*-butyl)phosphine borane complex (144 mg, 0.90 mmol, 3.0 eq.), tetrabutylammonium bromide (10 mg, 0.03 mmol, 10 mol%), NaOD (6 ml of a 40 wt% solution in H<sub>2</sub>O) and toluene (3 mL). The resulting biphasic solution was stirred at rt for 3 h. Then, EtOAc (15 mL) and water (10 mL) were added and the two layers separated. The aqueous layer was extracted with EtOAc (3 x 15 mL) and the combined organic layers were

dried (MgSO<sub>4</sub>) and concentrated under reduced pressure to give the crude product. Purification by flash column chromatography gave on silica using 9:1 – 8:2 hexane-EtOAc h<sub>7</sub>-2,6-bis(di-*tert*-butylphosphinomethyl)pyridine di-borane complex (126 mg, 99%) as a white crystalline solid, mp 153-155 °C; R<sub>f</sub> (8:2 hexane-EtOAc) 0.2; <sup>1</sup>H NMR (400 MHz, CDCl<sub>3</sub>) δ 7.50 (t, *J* = 8.0 Hz, 1H, *p*-CH), 7.41 (d, *J* = 8.0 Hz, 2H, *m*-CH), 3.25 (d, *J* = 12.5 Hz, 4H, CH<sub>2</sub>), 1.25 (d, *J* = 12.5 Hz, 36H, CH<sub>3</sub>), 0.85-0.02 (br m, 6H, BH<sub>3</sub>); <sup>31</sup>P NMR (162 MHz, CDCl<sub>3</sub>) δ 46.9; <sup>13</sup>C NMR (100.6 MHz, CDCl<sub>3</sub>) δ 154.3, 135.7 (Ar), 123.5 (Ar), 32.6 (d, *J* = 25.5 Hz, CMe<sub>3</sub>), 28.7 (d, *J* = 24.0 Hz, CH<sub>2</sub>), 28.1 (CMe<sub>3</sub>); MS (ESI) *m/z* 424 [(M + H)<sup>+</sup>, 100]; HRMS *m/z* calcd for C<sub>23</sub>H<sub>49</sub>NP<sub>2</sub>B<sub>2</sub> (M + H)<sup>+</sup> 424.3605, found 424.3608 (+3.1 ppm error).

### 3. Sample preparation

For the polarisation measurements, 2.4 mg of the catalyst was dissolved in 0.6 mL of d<sub>4</sub>-methanol and 5 uL of h<sub>5</sub>-pyridine added. The solutions were then injected into a 5mm NMR tube fitted with a Young's valve. A sample was prepared as described above and then pressurised with 3 bar of hydrogen gas before being allowed to stand for 1 hour so activate. [(C<sub>5</sub>H<sub>5</sub>N(CH<sub>2</sub>P(*t*Bu)<sub>2</sub>)<sub>2</sub>)Ir(H)<sub>2</sub>(C<sub>6</sub>H<sub>5</sub>N)]BF<sub>4</sub> (**4**) was formed in this way. Samples were degassed and pressurised with 3 bar of parahydrogen gas as necessary.

### 4. Kinetic measurements of the exchange of H<sub>2</sub> and pyridine in **4**

The activation parameters for H<sub>2</sub> elimination and pyridine exchange in **4** are present below in table s.1

|                          | $\Delta H^\ddagger$ / kJ mol <sup>-1</sup> | $\Delta S^\ddagger$ / J K <sup>-1</sup> mol <sup>-1</sup> |
|--------------------------|--------------------------------------------|-----------------------------------------------------------|
| H <sub>2</sub> exchange  | 81 ± 4                                     | 32 ± 12                                                   |
| Hydride site interchange | 88 ± 9                                     | 74 ± 32                                                   |
| Pyridine exchange        | 79 ± 3                                     | 50 ± 10                                                   |

**Table S. 1** Hydride interchange, H<sub>2</sub> loss and pyridine activation parameters for **4**.

| Temperature / K | Hydrogen dissociation rate constant / s <sup>-1</sup> | Hydride interchange rate constant / s <sup>-1</sup> |
|-----------------|-------------------------------------------------------|-----------------------------------------------------|
| 275             | 0.066                                                 | 0.404                                               |
| 278             | 0.099                                                 | 0.766                                               |
| 280             | 0.142                                                 | 1.161                                               |
| 283             | 0.201                                                 | 1.644                                               |
| 285             | 0.252                                                 | 2.129                                               |
| 290             | 0.450                                                 | 3.87                                                |
| 294             | 0.705                                                 | 6.15                                                |
| 298             | 1.124                                                 | 9.63                                                |

**Table S. 2** Hydrogen elimination and hydride site interchange rate constants for **4**.

| Temperature / K | Rate constants / s <sup>-1</sup> |
|-----------------|----------------------------------|
| 260             | 0.14                             |

|     |      |
|-----|------|
| 264 | 0.27 |
| 268 | 0.48 |
| 272 | 0.82 |
| 276 | 1.28 |
| 280 | 2.33 |
| 284 | 3.57 |
| 288 | 5.67 |

Table S 3. Pyridine dissociation rate constants for 4.

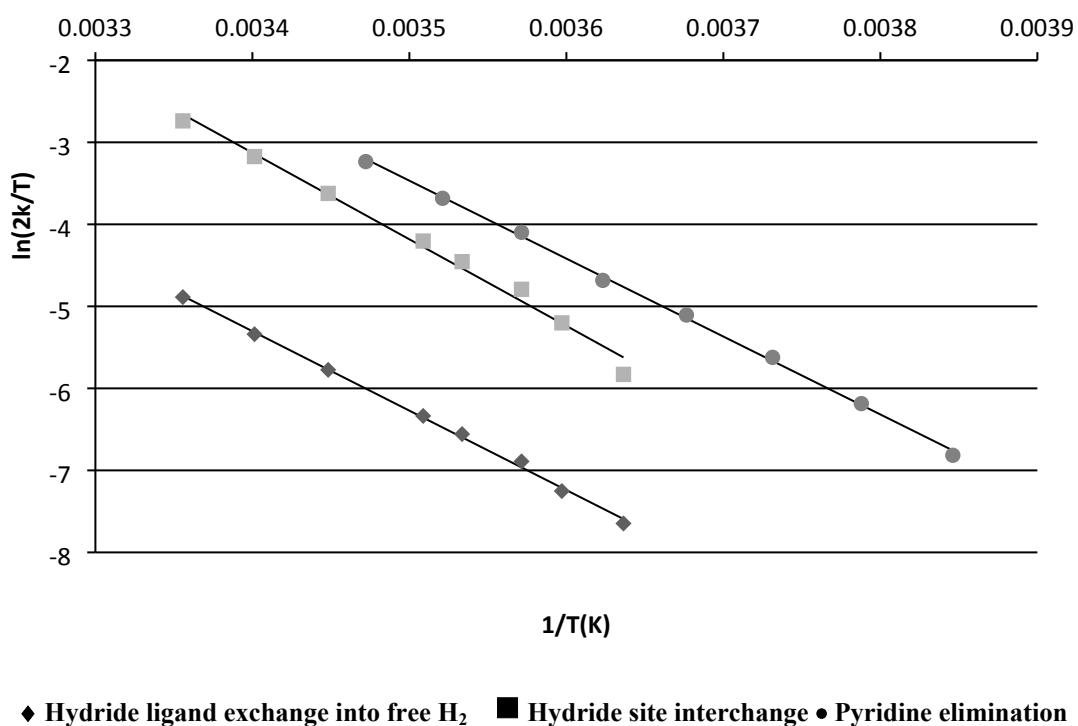

Figure S. 1 Eyring plots for the indicated processes.

## 5. Effect of hydrogen pressure.

| Pressure of Parahydrogen gas | Rate constants / s <sup>-1</sup> |
|------------------------------|----------------------------------|
| 1 atm                        | 0.43                             |
| 2 atm                        | 0.70                             |
| 3 atm                        | 0.90                             |

Table S.4 Hydride ligand exchange into free H<sub>2</sub> rates constants at 290 K as a function of H<sub>2</sub> pressure.



| Time / s | <sup>1</sup> H normalised signal integral. |                                      |                                         |
|----------|--------------------------------------------|--------------------------------------|-----------------------------------------|
|          | Excited hydride<br>at $\delta$ -22.3 / %   | Hydrogen gas at<br>$\delta$ 4.58 / % | Second hydride<br>at $\delta$ -18.9 / % |
| 0.01     | 92.31                                      | 1.74                                 | 5.95                                    |
| 0.02     | 88.53                                      | 0.86                                 | 10.61                                   |
| 0.04     | 80.06                                      | 1.76                                 | 18.18                                   |
| 0.06     | 72.09                                      | 2.51                                 | 25.41                                   |
| 0.08     | 66.59                                      | 3.35                                 | 30.06                                   |
| 0.1      | 61.39                                      | 4.18                                 | 34.43                                   |
| 0.12     | 58.03                                      | 4.94                                 | 37.02                                   |
| 0.14     | 56.59                                      | 5.55                                 | 37.86                                   |
| 0.16     | 51.53                                      | 7.16                                 | 41.31                                   |
| 0.18     | 51.39                                      | 7.46                                 | 41.15                                   |
| 0.2      | 49.38                                      | 7.80                                 | 42.82                                   |
| 0.25     | 47.22                                      | 9.96                                 | 42.81                                   |
| 0.3      | 44.40                                      | 12.11                                | 43.48                                   |
| 0.4      | 42.26                                      | 16.09                                | 41.65                                   |
| 0.5      | 40.70                                      | 17.96                                | 41.34                                   |
| 0.6      | 38.32                                      | 21.78                                | 39.90                                   |
| 0.7      | 36.84                                      | 25.65                                | 37.51                                   |
| 0.8      | 36.29                                      | 30.53                                | 33.18                                   |
| 0.9      | 34.66                                      | 32.89                                | 32.45                                   |
| 1        | 33.58                                      | 34.04                                | 32.38                                   |

**Table S. 5 Hydride ligand EXSY data at 294 K when the sample is pressurised to a 1 bar hydrogen gas.**

| Time / s | <sup>1</sup> H normalised signal integral. |                                      |                                         |
|----------|--------------------------------------------|--------------------------------------|-----------------------------------------|
|          | Excited hydride<br>at $\delta$ -22.3 / %   | Hydrogen gas at<br>$\delta$ 4.58 / % | Second hydride<br>at $\delta$ -18.9 / % |
| 0.01     | 94.45                                      | 0.25                                 | 5.29                                    |
| 0.02     | 88.29                                      | 1.28                                 | 10.43                                   |
| 0.04     | 77.71                                      | 2.79                                 | 19.50                                   |
| 0.06     | 71.20                                      | 4.02                                 | 24.78                                   |
| 0.08     | 63.74                                      | 5.37                                 | 30.89                                   |
| 0.1      | 59.78                                      | 6.43                                 | 33.78                                   |
| 0.12     | 56.95                                      | 7.28                                 | 35.76                                   |
| 0.14     | 52.57                                      | 8.23                                 | 39.20                                   |
| 0.16     | 50.60                                      | 10.38                                | 39.02                                   |
| 0.18     | 49.38                                      | 10.85                                | 39.76                                   |
| 0.2      | 48.32                                      | 10.40                                | 41.28                                   |
| 0.25     | 43.89                                      | 16.33                                | 39.78                                   |
| 0.3      | 40.76                                      | 19.06                                | 40.18                                   |
| 0.4      | 37.37                                      | 23.92                                | 38.71                                   |
| 0.5      | 35.58                                      | 28.58                                | 35.84                                   |
| 0.6      | 32.67                                      | 34.23                                | 33.10                                   |

|     |       |       |       |
|-----|-------|-------|-------|
| 0.7 | 30.88 | 39.40 | 29.72 |
| 0.8 | 29.11 | 42.69 | 28.20 |
| 0.9 | 25.81 | 47.26 | 26.93 |
| 1   | 24.17 | 50.22 | 25.62 |

**Table S. 6 Hydride ligand EXSY data at 294 K when the sample is pressurised to a 2 bar of hydrogen gas.**

| Time / s | <sup>1</sup> H normalised signal integral. |                                   |                                      |
|----------|--------------------------------------------|-----------------------------------|--------------------------------------|
|          | Excited hydride at $\delta$ -22.3 / %      | Hydrogen gas at $\delta$ 4.58 / % | Second hydride at $\delta$ -18.9 / % |
| 0.01     | 93.14                                      | 2.71                              | 4.15                                 |
| 0.02     | 85.93                                      | 2.46                              | 11.61                                |
| 0.04     | 78.62                                      | 3.69                              | 17.69                                |
| 0.06     | 70.68                                      | 5.87                              | 23.45                                |
| 0.08     | 63.69                                      | 7.56                              | 28.75                                |
| 0.1      | 60.41                                      | 8.22                              | 31.37                                |
| 0.12     | 56.60                                      | 8.94                              | 34.47                                |
| 0.14     | 51.09                                      | 12.02                             | 36.89                                |
| 0.16     | 50.60                                      | 11.65                             | 37.75                                |
| 0.18     | 46.91                                      | 13.60                             | 39.49                                |
| 0.2      | 45.06                                      | 16.31                             | 38.63                                |
| 0.25     | 42.54                                      | 20.10                             | 37.36                                |
| 0.3      | 38.48                                      | 22.70                             | 38.82                                |
| 0.4      | 35.01                                      | 30.29                             | 34.70                                |
| 0.5      | 32.51                                      | 34.89                             | 32.61                                |
| 0.6      | 27.80                                      | 43.20                             | 29.00                                |
| 0.7      | 28.35                                      | 45.39                             | 26.26                                |
| 0.8      | 24.59                                      | 50.88                             | 24.53                                |
| 0.9      | 23.77                                      | 52.28                             | 23.96                                |
| 1        | 22.53                                      | 56.30                             | 21.17                                |

**Table S. 7 Hydride ligand EXSY data at 294K when the sample is pressurised to a 3 bar hydrogen gas.**

## **6. Effect of pyridine concentration on the pyridine on hydride ligand exchange rates.**

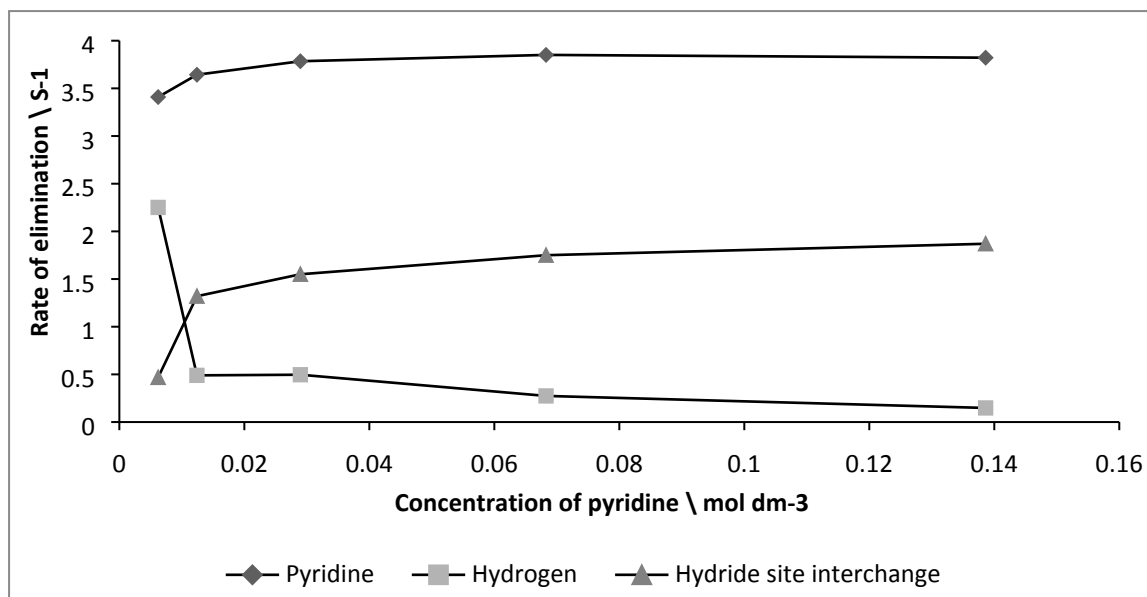

Figure S. 2 Plot of the rate of rates of hydride site exchange into free hydrogen, pyridine and hydride site interchange for 4 as a function of pyridine excess. Data results from EXSY analysis at 290 K and 3 bar H<sub>2</sub> pressure.

## 7. Quantification of polarisation:

Polarization enhancement factors were calculated using the following equations:

$$\text{Enhancement} = \frac{\text{Polarised signal}}{\text{Thermal signal}}$$

In a typical experiment, the thermal and polarised spectra were acquired using identical experimental parameters, where the thermal reference spectrum of the sample was only acquired once it has fully relaxed, (typically the sample was left for 10 minutes within the magnet) and before the sample was pressurised with parahydrogen gas. The raw integrals from the thermal and polarised measurement were used to calculate the enhancement level.

## 8. Effect of transfer field and temperature

In order to monitor the effect of the polarisation transfer field and the sample temperature a sample was prepared as described above and then pressurised with 3 bar of hydrogen gas before being allowed to stand for 1 hour to convert to **4**. The sample was then degassed and pressurised with 3 bar of parahydrogen gas before being immersed in a water bath at the desired temperature. The sample was shaken for approximately 10 seconds at either 0.5 or 65 G, and then rapidly inserted into the magnet for measurement. Parahydrogen was replenished after each measurement.

Samples that were polarized in the automated polarizer, used 12 mg of **1** and 0.31 mmol of pyridine in a methanol- $d_4$  volume of 3 ml. Parahydrogen was introduced into this solution via six inlet tubes at a pressure of 3 bar for 6 s. This solution was then transferred into the Bruker Avance III series 400 MHz spectrometer that was equipped with a TXO flow probe where the flow cell volume was 200  $\mu\text{l}$  by a flow of nitrogen gas. Unless otherwise stated, a single transient was then recorded of the nucleus of interest. Once interrogated, the solution is returned to the polarizing chamber and this process repeated as required. A coil surrounds the reaction chamber such that a magnetic field can be generated in the z direction. This coil was designed to produce static DC fields in the range  $-150$  to  $150 \times 10^{-4}$  T. Measurements can be made at either +ve or -ve G.

| Temperature / K | Enhancement of pyridine |       |      |
|-----------------|-------------------------|-------|------|
|                 | Ortho                   | Para  | Meta |
| 275             | -6.17                   | -4.47 | 5.65 |
| 295             | -6.36                   | -5.25 | 5.62 |
| 300             | -6.09                   | -4.62 | 4.94 |
| 305             | -5.64                   | -4.67 | 4.45 |
| 310             | -4.66                   | -4.30 | 4.09 |

**Table S. 8 Enhancement values for the ortho, meta and para positions of pyridine at 0 G.**

| Temperature / K | Enhancement of pyridine |        |       |
|-----------------|-------------------------|--------|-------|
|                 | Ortho                   | Para   | Meta  |
| 275             | -9.35                   | -7.50  | -0.11 |
| 295             | -12.26                  | -10.24 | -3.21 |
| 300             | -13.38                  | -11.66 | -3.04 |
| 310             | -13.28                  | -12.20 | -4.35 |

**Table S. 9 Enhancement values for the ortho, meta and para positions of pyridine at 65 G.**

| Catalyst               | Field / G | Enhancement of pyridine |        |       |
|------------------------|-----------|-------------------------|--------|-------|
|                        |           | Ortho                   | Para   | Meta  |
| <b>d<sub>4</sub>-4</b> | 0.5       | -6.78                   | -5.68  | 5.45  |
| <b>d<sub>4</sub>-4</b> | 65        | -16.38                  | -14.97 | -4.60 |
| <b>d<sub>4</sub>-7</b> | 0.5       | -9.23                   | -7.40  | 7.30  |
| <b>d<sub>4</sub>-7</b> | 65        | -16.73                  | -14.06 | -5.23 |

**Table S. 10** Table of enhancement values for ortho, meta and para protons of pyridine when polarised using  $[(C_5H_3N(CD_2P(tBu)_2)_2)IrH(C_8H_{11})(NCCH_3)]BF_4$  or  $[(C_5D_3N(CD_2P(tBu)_2)_2)IrH(C_8H_{11})(NCCH_3)]BF_4$ .

## 9. Characterisation data for 4

$^1H$  -22.3 (t, d,  $J_{HH} = 14.4$  Hz, 13.3 Hz, 1H, Ir-*H*), -18.92 (t, d,  $J_{HH} = 14.4$  Hz, 13.3 Hz 1H, Ir-*H*), 1.04 (s, 18H, PC-( $CH_3$ )<sub>3</sub>), 1.24 (s, 18H, PC-( $CH_3$ )<sub>3</sub>), 7.64 (d,  $J_{HH} = 7.8$  Hz, 2H, H<sub>3,5</sub>), 7.91 (t,  $J_{HH} = 7.8$  Hz, 1H) 9.03 (bs, meta). 8.06 (bs, ortho). 7.24 (bs, para).  $^{31}P$  50.25(s).  $^{13}C$  36.5 (s,  $CH_2$ ) 29.74 (s, PC( $CH_3$ )<sub>3</sub>), 37.84 (Ir- $CH_2$ -P), 122.54 (s, C<sub>3,5</sub>), 139.05 (s, C<sub>4</sub>), 165.11 (s, C<sub>2,6</sub>). ESI-MS: m/z 590.28 [ $M^+$ ] [ $M^+ - Py$ ]

## 10. X-Ray crystal structure for 4

Crystals of 4 were grown from a concentrated solution of 4 in methanol. The sample was layered with benzene and the solvent allowed to slowly evaporate. A suitable crystal was selected and mounted on a SuperNova, Single source Eos diffractometer. The crystal was kept at 109.9 K. The structure was solved using Olex2<sup>9</sup>, and the olex2.solve<sup>3</sup> structure solution program using charge flipping and refined within the XL<sup>10</sup> refinement package using least squares minimization.

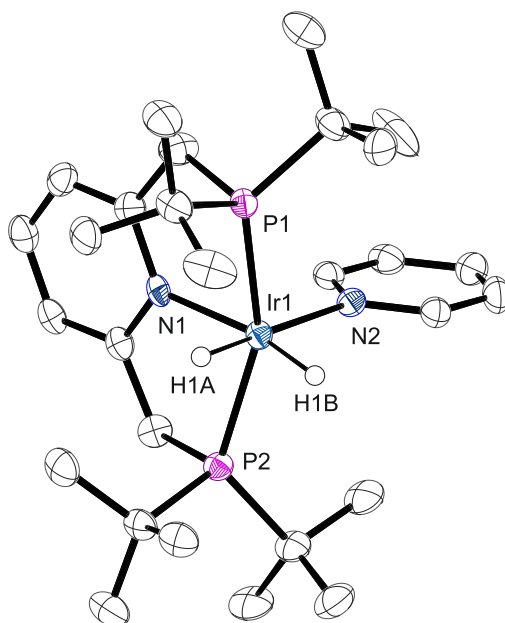

**Figure S. 3.** ORTEP plot of the cation 4. Ellipsoids are set at 50% probability hydrogen atoms are omitted for clarity.

**Crystal Data.** C<sub>28</sub>H<sub>50</sub>BF<sub>4</sub>IrN<sub>2</sub>P<sub>2</sub>, *M* = 755.65, orthorhombic, *a* = 21.6317(4) Å, *b* = 12.9870(3) Å, *c* = 22.4559(5) Å, *U* = 6308.6(2) Å<sup>3</sup>, *T* = 109.9, space group *Pbca* (no. 61), *Z* = 8, μ(Mo Kα) = 4.378, 14358 reflections measured, 5562 unique (*R*<sub>int</sub> = 0.0247) which were used in all calculations. The final *wR*(*F*<sub>2</sub>) was 0.0872 (all data).

**Table S. 11 Crystal data and structure refinement for sbd1011**

|                                                      |                                                                                 |
|------------------------------------------------------|---------------------------------------------------------------------------------|
| Identification code                                  | sbd1011                                                                         |
| Empirical formula                                    | C <sub>28</sub> H <sub>50</sub> BF <sub>4</sub> IrN <sub>2</sub> P <sub>2</sub> |
| Formula weight                                       | 755.65                                                                          |
| Temperature/K                                        | 109.9                                                                           |
| Crystal system                                       | orthorhombic                                                                    |
| Space group                                          | <i>Pbca</i>                                                                     |
| <i>a</i> /Å                                          | 21.6317(4)                                                                      |
| <i>b</i> /Å                                          | 12.9870(3)                                                                      |
| <i>c</i> /Å                                          | 22.4559(5)                                                                      |
| α/°                                                  | 90.00                                                                           |
| β/°                                                  | 90.00                                                                           |
| γ/°                                                  | 90.00                                                                           |
| Volume/Å <sup>3</sup>                                | 6308.6(2)                                                                       |
| <i>Z</i>                                             | 8                                                                               |
| ρ <sub>calc</sub> /mg/mm <sup>3</sup>                | 1.591                                                                           |
| <i>m</i> /mm <sup>-1</sup>                           | 4.378                                                                           |
| <i>F</i> (000)                                       | 3040                                                                            |
| Crystal size/mm <sup>3</sup>                         | 0.1931 × 0.1864 × 0.0554                                                        |
| Theta range for data collection                      | 6.54 to 50.04°                                                                  |
| Index ranges                                         | -23 ≤ <i>h</i> ≤ 25, -9 ≤ <i>k</i> ≤ 15, -26 ≤ <i>l</i> ≤ 11                    |
| Reflections collected                                | 14358                                                                           |
| Independent reflections                              | 5562 [ <i>R</i> (int) = 0.0247]                                                 |
| Data/restraints/parameters                           | 5562/17/370                                                                     |
| Goodness-of-fit on <i>F</i> <sup>2</sup>             | 1.053                                                                           |
| Final <i>R</i> indexes [ <i>I</i> > 2σ ( <i>I</i> )] | <i>R</i> <sub>1</sub> = 0.0332, <i>wR</i> <sub>2</sub> = 0.0779                 |
| Final <i>R</i> indexes [all data]                    | <i>R</i> <sub>1</sub> = 0.0473, <i>wR</i> <sub>2</sub> = 0.0872                 |
| Largest diff. peak/hole / e Å <sup>-3</sup>          | 3.311/-1.158                                                                    |

**Table S. 12**

Fractional Atomic Coordinates (×10<sup>4</sup>) and Equivalent Isotropic Displacement Parameters (Å<sup>2</sup>×10<sup>3</sup>) for sbd1011.

*U*<sub>eq</sub> is defined as 1/3 of the trace of the orthogonalised *U*<sub>ij</sub> tensor.

| Atom | <i>x</i>   | <i>Y</i> | <i>z</i>   | <i>U</i> (eq) |
|------|------------|----------|------------|---------------|
| B1   | 1911(2)    | 5600(4)  | 3953(2)    | 37.8(18)      |
| F2   | 2340(5)    | 6203(8)  | 4253(5)    | 52(2)         |
| F2A  | 2480(6)    | 6040(20) | 4054(12)   | 52(2)         |
| F3   | 1913.2(19) | 4627(3)  | 4206.1(18) | 51.7(10)      |
| F4   | 1363.5(17) | 6098(3)  | 4077(2)    | 57.6(12)      |
| F6   | 2062(8)    | 5610(10) | 3352(3)    | 63(4)         |
| F6A  | 1796(14)   | 5380(20) | 3362(5)    | 63(4)         |
| C1   | -1018(2)   | 4049(4)  | 4333(2)    | 22.3(12)      |

|     |             |             |            |          |
|-----|-------------|-------------|------------|----------|
| C2  | -972(3)     | 4966(4)     | 4650(2)    | 26.2(12) |
| C3  | -482(3)     | 5621(5)     | 4542(3)    | 29.5(13) |
| C4  | -48(3)      | 5359(4)     | 4121(3)    | 28.6(13) |
| C5  | -108(2)     | 4443(4)     | 3807(3)    | 24.3(12) |
| C6  | -1561(2)    | 3359(4)     | 4419(3)    | 26.4(13) |
| C7  | 319(3)      | 4185(5)     | 3312(3)    | 33.4(14) |
| C8  | -1452(2)    | 4051(4)     | 2824(2)    | 24.7(12) |
| C9  | -1847(2)    | 4489(5)     | 2414(3)    | 29.2(13) |
| C10 | -2025(2)    | 3921(5)     | 1927(3)    | 30.6(14) |
| C11 | -1813(3)    | 2942(5)     | 1869(3)    | 32.6(14) |
| C12 | -1432(2)    | 2534(4)     | 2302(3)    | 26.3(12) |
| C13 | -2231(2)    | 1579(5)     | 3975(3)    | 28.5(13) |
| C14 | -2720(3)    | 1925(6)     | 4423(3)    | 40.4(16) |
| C15 | -2239(3)    | 404(5)      | 3912(3)    | 41.0(16) |
| C16 | -2406(3)    | 2022(6)     | 3371(3)    | 42.3(17) |
| C18 | -1137(2)    | 1316(4)     | 4835(3)    | 26.3(13) |
| C19 | -1632(3)    | 1156(5)     | 5313(3)    | 37.3(15) |
| C20 | -863(3)     | 280(5)      | 4655(3)    | 33.3(14) |
| C21 | -626(3)     | 1974(5)     | 5116(3)    | 34.5(14) |
| C22 | 528(3)      | 2877(5)     | 2286(3)    | 34.5(14) |
| C23 | -44(3)      | 3196(9)     | 1931(3)    | 71(3)    |
| C24 | 710(3)      | 1797(6)     | 2077(3)    | 52(2)    |
| C25 | 1050(3)     | 3644(5)     | 2141(3)    | 41.3(16) |
| C26 | 962(3)      | 2228(5)     | 3538(3)    | 30.9(14) |
| C27 | 919(3)      | 2615(6)     | 4180(3)    | 40.6(17) |
| C28 | 902(3)      | 1061(5)     | 3540(3)    | 44.6(18) |
| C30 | 1611(3)     | 2530(6)     | 3314(3)    | 39.7(16) |
| Ir1 | -655.83(9)  | 2353.18(16) | 3458.75(9) | 19.27(9) |
| N1  | -592.5(18)  | 3784(3)     | 3916.7(19) | 19.1(9)  |
| N2  | -1240.3(19) | 3075(3)     | 2781(2)    | 21.3(10) |
| P1  | 305.4(6)    | 2818.8(11)  | 3101.6(6)  | 20.8(3)  |
| P2  | -1419.3(6)  | 2027.1(11)  | 4156.7(6)  | 21.3(3)  |

**Table S. 13**

Anisotropic Displacement Parameters ( $\text{\AA}^2 \times 10^3$ ) for sbd1011. The Anisotropic displacement factor exponent takes the form:  $-2\pi^2[h^2a^{*2}U_{11} + \dots + 2hka \times b \times U_{12}]$

| Atom | $U_{11}$ | $U_{22}$ | $U_{33}$ | $U_{23}$ | $U_{13}$ | $U_{12}$ |
|------|----------|----------|----------|----------|----------|----------|
| B1   | 44(4)    | 37(4)    | 32(4)    | -4(3)    | 13(3)    | 2(3)     |
| F2   | 33(4)    | 63(5)    | 61(6)    | 6(4)     | 15(4)    | -15(4)   |
| F2A  | 33(4)    | 63(5)    | 61(6)    | 6(4)     | 15(4)    | -15(4)   |
| F3   | 66(3)    | 37(2)    | 51(3)    | 1.4(19)  | 18(2)    | 3.5(19)  |
| F4   | 41(2)    | 57(3)    | 74(3)    | 2(2)     | 16(2)    | 9(2)     |
| F6   | 102(10)  | 54(7)    | 33(3)    | 4(3)     | 23(4)    | 32(6)    |
| F6A  | 102(10)  | 54(7)    | 33(3)    | 4(3)     | 23(4)    | 32(6)    |
| C1   | 22(3)    | 25(3)    | 20(3)    | 1(2)     | -3(2)    | 6(2)     |
| C2   | 32(3)    | 28(3)    | 18(3)    | -2(2)    | 1(2)     | 6(3)     |
| C3   | 37(3)    | 30(3)    | 22(3)    | 1(3)     | -5(3)    | 4(3)     |

|     |           |           |           |          |          |          |
|-----|-----------|-----------|-----------|----------|----------|----------|
| C4  | 30(3)     | 27(3)     | 29(3)     | 3(3)     | -9(3)    | -4(3)    |
| C5  | 21(3)     | 26(3)     | 26(3)     | 4(2)     | -4(2)    | 3(2)     |
| C6  | 24(3)     | 25(3)     | 31(3)     | 1(3)     | 0(2)     | 3(2)     |
| C7  | 31(3)     | 28(3)     | 41(4)     | -4(3)    | 11(3)    | 0(3)     |
| C8  | 21(3)     | 32(3)     | 22(3)     | 3(2)     | 1(2)     | -3(2)    |
| C9  | 22(3)     | 36(3)     | 30(3)     | 9(3)     | 0(3)     | 0(2)     |
| C10 | 20(3)     | 43(4)     | 29(3)     | 6(3)     | -6(3)    | -3(3)    |
| C11 | 27(3)     | 49(4)     | 22(3)     | -4(3)    | -4(2)    | -3(3)    |
| C12 | 23(3)     | 32(3)     | 23(3)     | -1(3)    | 1(2)     | -2(2)    |
| C13 | 17(3)     | 36(3)     | 33(3)     | 4(3)     | 0(2)     | 0(2)     |
| C14 | 17(3)     | 52(4)     | 52(4)     | 8(3)     | 2(3)     | -1(3)    |
| C15 | 31(3)     | 41(4)     | 51(4)     | 1(3)     | -5(3)    | -12(3)   |
| C16 | 23(3)     | 57(4)     | 47(4)     | 13(4)    | -10(3)   | -11(3)   |
| C18 | 23(3)     | 31(3)     | 25(3)     | 9(3)     | -3(2)    | 3(2)     |
| C19 | 33(3)     | 50(4)     | 29(4)     | 10(3)    | 6(3)     | 4(3)     |
| C20 | 33(3)     | 32(3)     | 35(4)     | 9(3)     | 0(3)     | 6(3)     |
| C21 | 31(3)     | 45(4)     | 28(3)     | 7(3)     | -6(3)    | 5(3)     |
| C22 | 25(3)     | 54(4)     | 24(3)     | 3(3)     | 4(3)     | -1(3)    |
| C23 | 40(4)     | 145(9)    | 26(4)     | 24(5)    | 5(3)     | 9(5)     |
| C24 | 57(5)     | 62(5)     | 35(4)     | -19(4)   | 12(3)    | -27(4)   |
| C25 | 42(4)     | 49(4)     | 33(4)     | 3(3)     | 14(3)    | 5(3)     |
| C26 | 22(3)     | 42(4)     | 29(3)     | 9(3)     | -1(2)    | 6(3)     |
| C27 | 27(3)     | 68(5)     | 26(3)     | 1(3)     | -5(3)    | -6(3)    |
| C28 | 37(4)     | 41(4)     | 56(5)     | 15(3)    | 15(3)    | 19(3)    |
| C30 | 22(3)     | 64(5)     | 33(4)     | 5(3)     | 3(3)     | 3(3)     |
| Ir1 | 15.37(12) | 24.19(13) | 18.26(13) | -0.45(9) | -1.32(8) | 1.99(8)  |
| N1  | 17(2)     | 26(2)     | 14(2)     | 0.4(19)  | -3.9(18) | 6.6(19)  |
| N2  | 16(2)     | 25(2)     | 23(2)     | 0(2)     | -0.9(19) | -0.4(18) |
| P1  | 15.4(6)   | 28.0(7)   | 19.1(7)   | -2.3(6)  | 1.1(5)   | 1.2(6)   |
| P2  | 17.1(7)   | 23.5(7)   | 23.2(7)   | 0.3(6)   | 0.3(6)   | 0.2(6)   |

**Table S. 14 Selected bond lengths.**

| Atom | Atom | Length/Å | Atom | Atom | Length/Å  |
|------|------|----------|------|------|-----------|
| B1   | F2   | 1.389(6) | C12  | N2   | 1.350(7)  |
| B1   | F2A  | 1.373(8) | C13  | C14  | 1.526(8)  |
| B1   | F3   | 1.385(5) | C13  | C15  | 1.532(8)  |
| B1   | F4   | 1.377(5) | C13  | C16  | 1.521(8)  |
| B1   | F6   | 1.389(6) | C13  | P2   | 1.895(6)  |
| B1   | F6A  | 1.383(8) | C18  | C19  | 1.531(8)  |
| C1   | C2   | 1.392(8) | C18  | C20  | 1.524(8)  |
| C1   | C6   | 1.490(8) | C18  | C21  | 1.533(8)  |
| C1   | N1   | 1.356(7) | C18  | P2   | 1.883(6)  |
| C2   | C3   | 1.379(8) | C22  | C23  | 1.528(9)  |
| C3   | C4   | 1.376(8) | C22  | C24  | 1.532(10) |
| C4   | C5   | 1.389(8) | C22  | C25  | 1.542(9)  |
| C5   | C7   | 1.484(8) | C22  | P1   | 1.895(6)  |
| C5   | N1   | 1.375(7) | C26  | C27  | 1.531(9)  |



|     |     |          |     |     |            |
|-----|-----|----------|-----|-----|------------|
| C6  | P2  | 1.853(6) | C26 | C28 | 1.520(9)   |
| C7  | P1  | 1.836(6) | C26 | C30 | 1.541(8)   |
| C8  | C9  | 1.379(8) | C26 | P1  | 1.888(6)   |
| C8  | N2  | 1.350(7) | Ir1 | N1  | 2.128(4)   |
| C9  | C10 | 1.375(8) | Ir1 | N2  | 2.190(4)   |
| C10 | C11 | 1.358(9) | Ir1 | P1  | 2.3092(14) |
| C11 | C12 | 1.380(8) | Ir1 | P2  | 2.3159(14) |

**Table S. 15 Selected bond angles**

| Atom | Atom | Atom | Angle/°   | Atom | Atom | Atom | Angle/°    |
|------|------|------|-----------|------|------|------|------------|
| F2A  | B1   | F2   | 24.4(8)   | C20  | C18  | C21  | 108.8(5)   |
| F2A  | B1   | F3   | 107.7(13) | C20  | C18  | P2   | 110.2(4)   |
| F2A  | B1   | F4   | 123.0(12) | C21  | C18  | P2   | 107.1(4)   |
| F2A  | B1   | F6   | 86.8(9)   | C23  | C22  | C24  | 107.3(6)   |
| F2A  | B1   | F6A  | 113.9(13) | C23  | C22  | C25  | 107.9(6)   |
| F3   | B1   | F2   | 108.2(6)  | C23  | C22  | P1   | 108.0(4)   |
| F3   | B1   | F6   | 113.9(7)  | C24  | C22  | C25  | 109.7(5)   |
| F4   | B1   | F2   | 102.2(7)  | C24  | C22  | P1   | 108.9(5)   |
| F4   | B1   | F3   | 110.4(4)  | C25  | C22  | P1   | 114.6(4)   |
| F4   | B1   | F6   | 113.2(7)  | C27  | C26  | C30  | 106.2(5)   |
| F4   | B1   | F6A  | 98.0(14)  | C27  | C26  | P1   | 108.0(4)   |
| F6   | B1   | F2   | 108.0(6)  | C28  | C26  | C27  | 108.6(5)   |
| F6A  | B1   | F2   | 134.8(12) | C28  | C26  | C30  | 109.4(5)   |
| F6A  | B1   | F3   | 101.6(14) | C28  | C26  | P1   | 110.1(4)   |
| F6A  | B1   | F6   | 27.1(11)  | C30  | C26  | P1   | 114.4(4)   |
| C2   | C1   | C6   | 120.3(5)  | N1   | Ir1  | N2   | 89.96(16)  |
| N1   | C1   | C2   | 121.4(5)  | N1   | Ir1  | P1   | 83.18(12)  |
| N1   | C1   | C6   | 118.1(5)  | N1   | Ir1  | P2   | 83.02(12)  |
| C3   | C2   | C1   | 119.5(5)  | N2   | Ir1  | P1   | 99.56(11)  |
| C4   | C3   | C2   | 119.5(6)  | N2   | Ir1  | P2   | 97.89(12)  |
| C3   | C4   | C5   | 119.8(6)  | P1   | Ir1  | P2   | 157.68(5)  |
| C4   | C5   | C7   | 121.1(5)  | C1   | N1   | C5   | 118.9(5)   |
| N1   | C5   | C4   | 120.8(5)  | C1   | N1   | Ir1  | 120.7(4)   |
| N1   | C5   | C7   | 117.9(5)  | C5   | N1   | Ir1  | 120.4(3)   |
| C1   | C6   | P2   | 112.9(4)  | C8   | N2   | Ir1  | 123.1(4)   |
| C5   | C7   | P1   | 113.7(4)  | C12  | N2   | C8   | 116.2(5)   |
| N2   | C8   | C9   | 123.3(5)  | C12  | N2   | Ir1  | 120.5(4)   |
| C10  | C9   | C8   | 118.9(6)  | C7   | P1   | C22  | 101.9(3)   |
| C11  | C10  | C9   | 119.0(6)  | C7   | P1   | C26  | 104.3(3)   |
| C10  | C11  | C12  | 119.6(6)  | C7   | P1   | Ir1  | 100.25(19) |
| N2   | C12  | C11  | 123.0(5)  | C22  | P1   | Ir1  | 125.08(19) |
| C14  | C13  | C15  | 110.3(5)  | C26  | P1   | C22  | 109.1(3)   |
| C14  | C13  | P2   | 114.2(4)  | C26  | P1   | Ir1  | 113.0(2)   |
| C15  | C13  | P2   | 109.6(4)  | C6   | P2   | C13  | 101.6(3)   |
| C16  | C13  | C14  | 107.7(5)  | C6   | P2   | C18  | 104.8(3)   |
| C16  | C13  | C15  | 107.0(5)  | C6   | P2   | Ir1  | 99.34(18)  |
| C16  | C13  | P2   | 107.8(4)  | C13  | P2   | Ir1  | 124.84(19) |

|     |     |     |          |     |    |     |            |
|-----|-----|-----|----------|-----|----|-----|------------|
| C19 | C18 | C21 | 106.9(5) | C18 | P2 | C13 | 108.9(3)   |
| C19 | C18 | P2  | 114.0(4) | C18 | P2 | Ir1 | 113.91(18) |
| C20 | C18 | C19 | 109.7(5) |     |    |     |            |

**Table S. 16 Selected Torsion Angles**

| <b>A</b> | <b>B</b> | <b>C</b> | <b>D</b> | <b>Angle/°</b> |
|----------|----------|----------|----------|----------------|
| C1       | C2       | C3       | C4       | 0.2(8)         |
| C1       | C6       | P2       | C13      | -153.8(4)      |
| C1       | C6       | P2       | C18      | 92.8(4)        |
| C1       | C6       | P2       | Ir1      | -25.1(4)       |
| C2       | C1       | C6       | P2       | -161.3(4)      |
| C2       | C1       | N1       | C5       | -0.3(7)        |
| C2       | C1       | N1       | Ir1      | 177.8(4)       |
| C2       | C3       | C4       | C5       | 0.3(8)         |
| C3       | C4       | C5       | C7       | 174.3(5)       |
| C3       | C4       | C5       | N1       | -0.9(8)        |
| C4       | C5       | C7       | P1       | 163.6(4)       |
| C4       | C5       | N1       | C1       | 0.9(7)         |
| C4       | C5       | N1       | Ir1      | -177.3(4)      |
| C5       | C7       | P1       | C22      | 151.9(4)       |
| C5       | C7       | P1       | C26      | -94.7(5)       |
| C5       | C7       | P1       | Ir1      | 22.4(5)        |
| C6       | C1       | C2       | C3       | -176.6(5)      |
| C6       | C1       | N1       | C5       | 176.1(5)       |
| C6       | C1       | N1       | Ir1      | -5.7(6)        |
| C7       | C5       | N1       | C1       | -174.5(5)      |
| C7       | C5       | N1       | Ir1      | 7.4(6)         |
| C8       | C9       | C10      | C11      | 0.9(8)         |
| C9       | C8       | N2       | C12      | 0.6(8)         |
| C9       | C8       | N2       | Ir1      | -176.4(4)      |
| C9       | C10      | C11      | C12      | 0.9(9)         |
| C10      | C11      | C12      | N2       | -2.1(9)        |
| C11      | C12      | N2       | C8       | 1.3(8)         |
| C11      | C12      | N2       | Ir1      | 178.4(4)       |
| C14      | C13      | P2       | C6       | -40.4(5)       |
| C14      | C13      | P2       | C18      | 69.9(5)        |
| C14      | C13      | P2       | Ir1      | -150.5(4)      |
| C15      | C13      | P2       | C6       | -164.6(4)      |
| C15      | C13      | P2       | C18      | -54.3(5)       |
| C15      | C13      | P2       | Ir1      | 85.2(5)        |
| C16      | C13      | P2       | C6       | 79.3(5)        |
| C16      | C13      | P2       | C18      | -170.4(4)      |
| C16      | C13      | P2       | Ir1      | -30.9(5)       |
| C19      | C18      | P2       | C6       | 69.1(5)        |
| C19      | C18      | P2       | C13      | -39.1(5)       |
| C19      | C18      | P2       | Ir1      | 176.6(4)       |

|     |     |    |     |           |
|-----|-----|----|-----|-----------|
| C20 | C18 | P2 | C6  | -167.1(4) |
| C20 | C18 | P2 | C13 | 84.8(4)   |
| C20 | C18 | P2 | Ir1 | -59.6(4)  |
| C21 | C18 | P2 | C6  | -49.0(4)  |
| C21 | C18 | P2 | C13 | -157.1(4) |
| C21 | C18 | P2 | Ir1 | 58.5(4)   |
| C23 | C22 | P1 | C7  | -78.9(6)  |
| C23 | C22 | P1 | C26 | 171.2(6)  |
| C23 | C22 | P1 | Ir1 | 32.8(7)   |
| C24 | C22 | P1 | C7  | 164.8(4)  |
| C24 | C22 | P1 | C26 | 54.9(5)   |
| C24 | C22 | P1 | Ir1 | -83.5(4)  |
| C25 | C22 | P1 | C7  | 41.4(5)   |
| C25 | C22 | P1 | C26 | -68.5(5)  |
| C25 | C22 | P1 | Ir1 | 153.1(4)  |
| C27 | C26 | P1 | C7  | 46.4(5)   |
| C27 | C26 | P1 | C22 | 154.6(4)  |
| C27 | C26 | P1 | Ir1 | -61.6(5)  |
| C28 | C26 | P1 | C7  | 164.8(4)  |
| C28 | C26 | P1 | C22 | -87.0(5)  |
| C28 | C26 | P1 | Ir1 | 56.8(5)   |
| C30 | C26 | P1 | C7  | -71.6(5)  |
| C30 | C26 | P1 | C22 | 36.7(6)   |
| C30 | C26 | P1 | Ir1 | -179.5(4) |
| N1  | C1  | C2 | C3  | -0.2(8)   |
| N1  | C1  | C6 | P2  | 22.2(6)   |
| N1  | C5  | C7 | P1  | -21.1(7)  |
| N1  | Ir1 | N2 | C8  | -6.5(4)   |
| N1  | Ir1 | N2 | C12 | 176.6(4)  |
| N1  | Ir1 | P1 | C7  | -14.0(2)  |
| N1  | Ir1 | P1 | C22 | -126.5(3) |
| N1  | Ir1 | P1 | C26 | 96.4(2)   |
| N1  | Ir1 | P2 | C6  | 16.7(2)   |
| N1  | Ir1 | P2 | C13 | 128.0(3)  |
| N1  | Ir1 | P2 | C18 | -94.2(2)  |
| N2  | C8  | C9 | C10 | -1.7(8)   |
| N2  | Ir1 | N1 | C1  | 88.6(4)   |
| N2  | Ir1 | N1 | C5  | -93.3(4)  |
| N2  | Ir1 | P1 | C7  | 74.8(3)   |
| N2  | Ir1 | P1 | C22 | -37.7(3)  |
| N2  | Ir1 | P1 | C26 | -174.7(2) |
| N2  | Ir1 | P2 | C6  | -72.3(2)  |
| N2  | Ir1 | P2 | C13 | 39.0(3)   |
| N2  | Ir1 | P2 | C18 | 176.8(2)  |
| P1  | Ir1 | N1 | C1  | -171.8(4) |
| P1  | Ir1 | N1 | C5  | 6.4(4)    |
| P1  | Ir1 | N2 | C8  | -89.6(4)  |

|    |     |    |     |           |
|----|-----|----|-----|-----------|
| P1 | Ir1 | N2 | C12 | 93.6(4)   |
| P1 | Ir1 | P2 | C6  | 68.9(2)   |
| P1 | Ir1 | P2 | C13 | -179.8(2) |
| P1 | Ir1 | P2 | C18 | -42.0(3)  |
| P2 | Ir1 | N1 | C1  | -9.3(4)   |
| P2 | Ir1 | N1 | C5  | 168.8(4)  |
| P2 | Ir1 | N2 | C8  | 76.4(4)   |
| P2 | Ir1 | N2 | C12 | -100.4(4) |
| P2 | Ir1 | P1 | C7  | -66.2(3)  |
| P2 | Ir1 | P1 | C22 | -178.7(3) |
| P2 | Ir1 | P1 | C26 | 44.3(3)   |

**Table S. 17: Hydrogen Atom Coordinates ( $\text{\AA}\times 10^4$ ) and Isotropic Displacement Parameters ( $\text{\AA}^2\times 10^3$ )**

| Atom | <i>x</i> | <i>y</i> | <i>z</i> | U(eq) |
|------|----------|----------|----------|-------|
| H2   | -1275    | 5140     | 4939     | 31    |
| H3   | -445     | 6248     | 4757     | 35    |
| H4   | 291      | 5803     | 4045     | 34    |
| H6A  | -1919    | 3648     | 4200     | 32    |
| H6B  | -1669    | 3341     | 4847     | 32    |
| H7A  | 745      | 4373     | 3430     | 40    |
| H7B  | 208      | 4604     | 2960     | 40    |
| H8   | -1322    | 4455     | 3154     | 30    |
| H9   | -1993    | 5172     | 2468     | 35    |
| H10  | -2292    | 4209     | 1635     | 37    |
| H11  | -1926    | 2541     | 1532     | 39    |
| H12  | -1300    | 1840     | 2261     | 32    |
| H14A | -2719    | 2678     | 4449     | 61    |
| H14B | -2626    | 1631     | 4814     | 61    |
| H14C | -3128    | 1687     | 4292     | 61    |
| H15A | -2631    | 187      | 3733     | 62    |
| H15B | -2195    | 88       | 4306     | 62    |
| H15C | -1895    | 187      | 3657     | 62    |
| H16A | -2130    | 1741     | 3065     | 63    |
| H16B | -2366    | 2773     | 3381     | 63    |
| H16C | -2834    | 1837     | 3277     | 63    |
| H19A | -1842    | 1810     | 5392     | 56    |
| H19B | -1437    | 906      | 5679     | 56    |
| H19C | -1934    | 648      | 5173     | 56    |
| H20A | -1189    | -155     | 4485     | 50    |
| H20B | -688     | -59      | 5006     | 50    |
| H20C | -538     | 387      | 4357     | 50    |
| H21A | -310     | 2128     | 4816     | 52    |
| H21B | -437     | 1596     | 5447     | 52    |
| H21C | -804     | 2618     | 5264     | 52    |
| H23A | 60       | 3229     | 1507     | 106   |
| H23B | -184     | 3875     | 2067     | 106   |
| H23C | -374     | 2690     | 1993     | 106   |
| H24A | 383      | 1308     | 2183     | 77    |

|      |          |          |          |        |
|------|----------|----------|----------|--------|
| H24B | 1097     | 1592     | 2271     | 77     |
| H24C | 768      | 1799     | 1644     | 77     |
| H25A | 1429     | 3437     | 2349     | 62     |
| H25B | 929      | 4336     | 2271     | 62     |
| H25C | 1125     | 3648     | 1710     | 62     |
| H27A | 1022     | 3350     | 4192     | 61     |
| H27B | 1209     | 2231     | 4430     | 61     |
| H27C | 497      | 2514     | 4328     | 61     |
| H28A | 515      | 865      | 3736     | 67     |
| H28B | 1252     | 760      | 3757     | 67     |
| H28C | 902      | 806      | 3129     | 67     |
| H30A | 1679     | 2237     | 2918     | 60     |
| H30B | 1923     | 2264     | 3590     | 60     |
| H30C | 1643     | 3282     | 3294     | 60     |
| H1A  | -290(20) | 1880(50) | 3890(20) | 46(19) |
| H1B  | -700(40) | 1330(30) | 3260(40) | 90(30) |

## References

- (1) Hermann, D.; Gandelman, M.; Rozenberg, H.; Shimon, L. J. W.; Milstein, D. *Organometallics* **2002**, *21*, 812.
- (2) Hull, J. W.; Wang, C. W. *Heterocycles* **2004**, *63*, 411.
- (3) Herdering, W.; Krüger, H.-J. *Journal of Labelled Compounds and Radiopharmaceuticals* **1998**, *41*, 301.
- (4) Boekelheide, V.; Linn, W. J. *Journal of the American Chemical Society* **1954**, *76*, 1286.
- (5) Ueno, Y.; Watanabe, Y.; Shibata, A.; Yoshikawa, K.; Takano, T.; Kohara, M.; Kitade, Y. *Bioorganic & Medicinal Chemistry* **2009**, *17*, 1974.
- (6) Paolucci, G.; Fischer, R. D.; Benetollo, F.; Seraglia, R.; Bombieri, G. *Journal of Organometallic Chemistry* **1991**, *412*, 327.
- (7) Sprakel, V. S. I.; Elemans, J. A. A. W.; Feiters, M. C.; Lucchese, B.; Karlin, K. D.; Nolte, R. J. M. *European Journal of Organic Chemistry* **2006**, *2006*, 2281.
- (8) Lebel, H.; Morin, S.; Paquet, V. *Organic Letters* **2003**, *5*, 2347.
- (9) Dolomanov, O. V.; Bourhis, L. J.; Gildea, R. J.; Howard, J. A. K.; Puschmann, H. *J. Appl. Crystallogr* **2009**, *42*, 339.
- (10) Sheldrick, G. M. *Acta. Crystallogr. Sect. A* **2008**, *64*, 112.
